# Supplementary material for: Tin(iv) chalcogenoether complexes as single source precursors for the chemical vapour deposition of SnE2 and SnE (E = S, Se) thin films
Source: Royal Society of Chemistry journal article supplement (doi:10.1039/c7dt03848h), 2018-01-01
Supplement: c7dt03848h1.pdf [file c7dt03848h1.pdf]

Electronic Supplementary Information for:

**Tin(IV) Chalcogenoether Complexes as Single Source Precursors  
for the Chemical Vapour Deposition of SnE<sub>2</sub> and SnE (E = S, Se)  
Thin Films**

Chitra Gurnani<sup>a</sup>, Samantha L. Hawken<sup>b</sup>, Andrew L. Hector<sup>b</sup>, Ruomeng Huang<sup>c</sup>, Marek Jura<sup>d</sup>,  
William Levason<sup>b</sup>, James Perkins<sup>b</sup>, Gillian Reid<sup>b</sup> and Gavin B. G. Stenning<sup>d</sup>

a. School of Natural Sciences, Mahindra Ecole Centrale, Hyderabad, India.

b. Chemistry, University of Southampton, Southampton SO17 1BJ, UK; email:

[G.Reid@soton.ac.uk](mailto:G.Reid@soton.ac.uk)

c. Electronic and Computer Science, University of Southampton, Southampton SO17 1BJ,  
UK.

d. ISIS Neutron and Muon Source, Rutherford Appleton Laboratory, Harwell Science and  
Innovation Campus, Didcot, OX11 0QX, UK

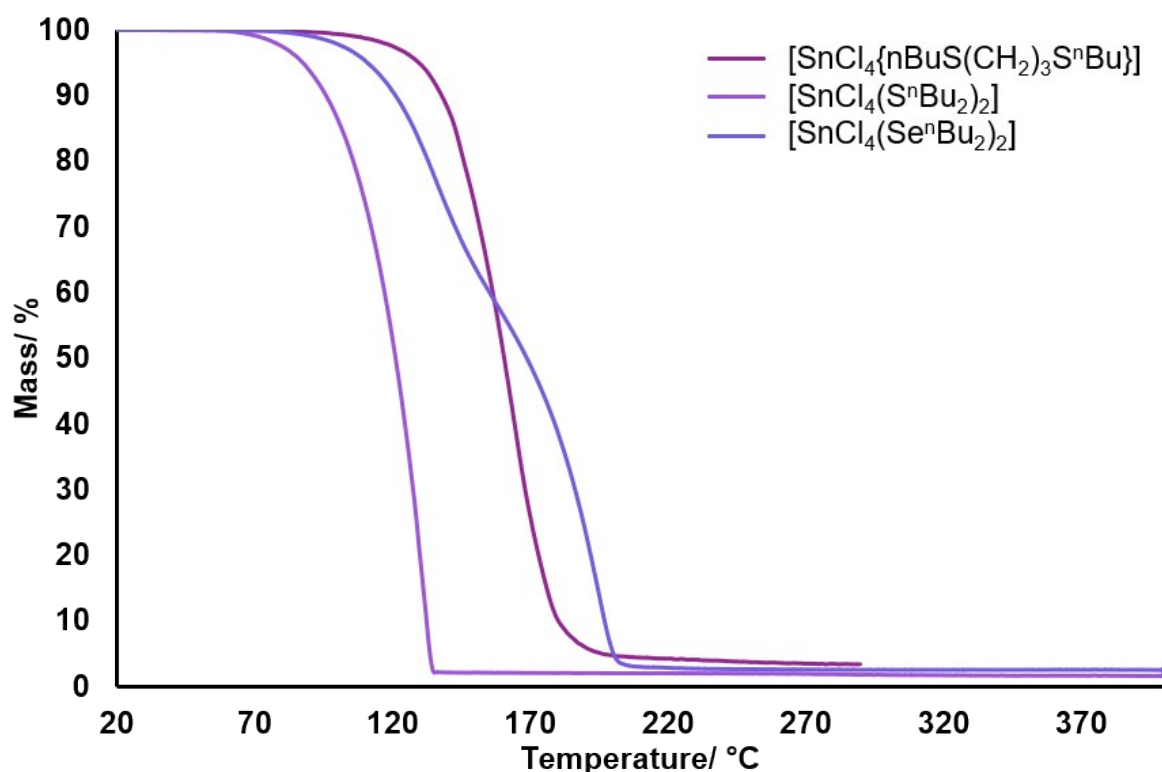

Figure S1: TGA profiles from precursors (2), (3) and (4)

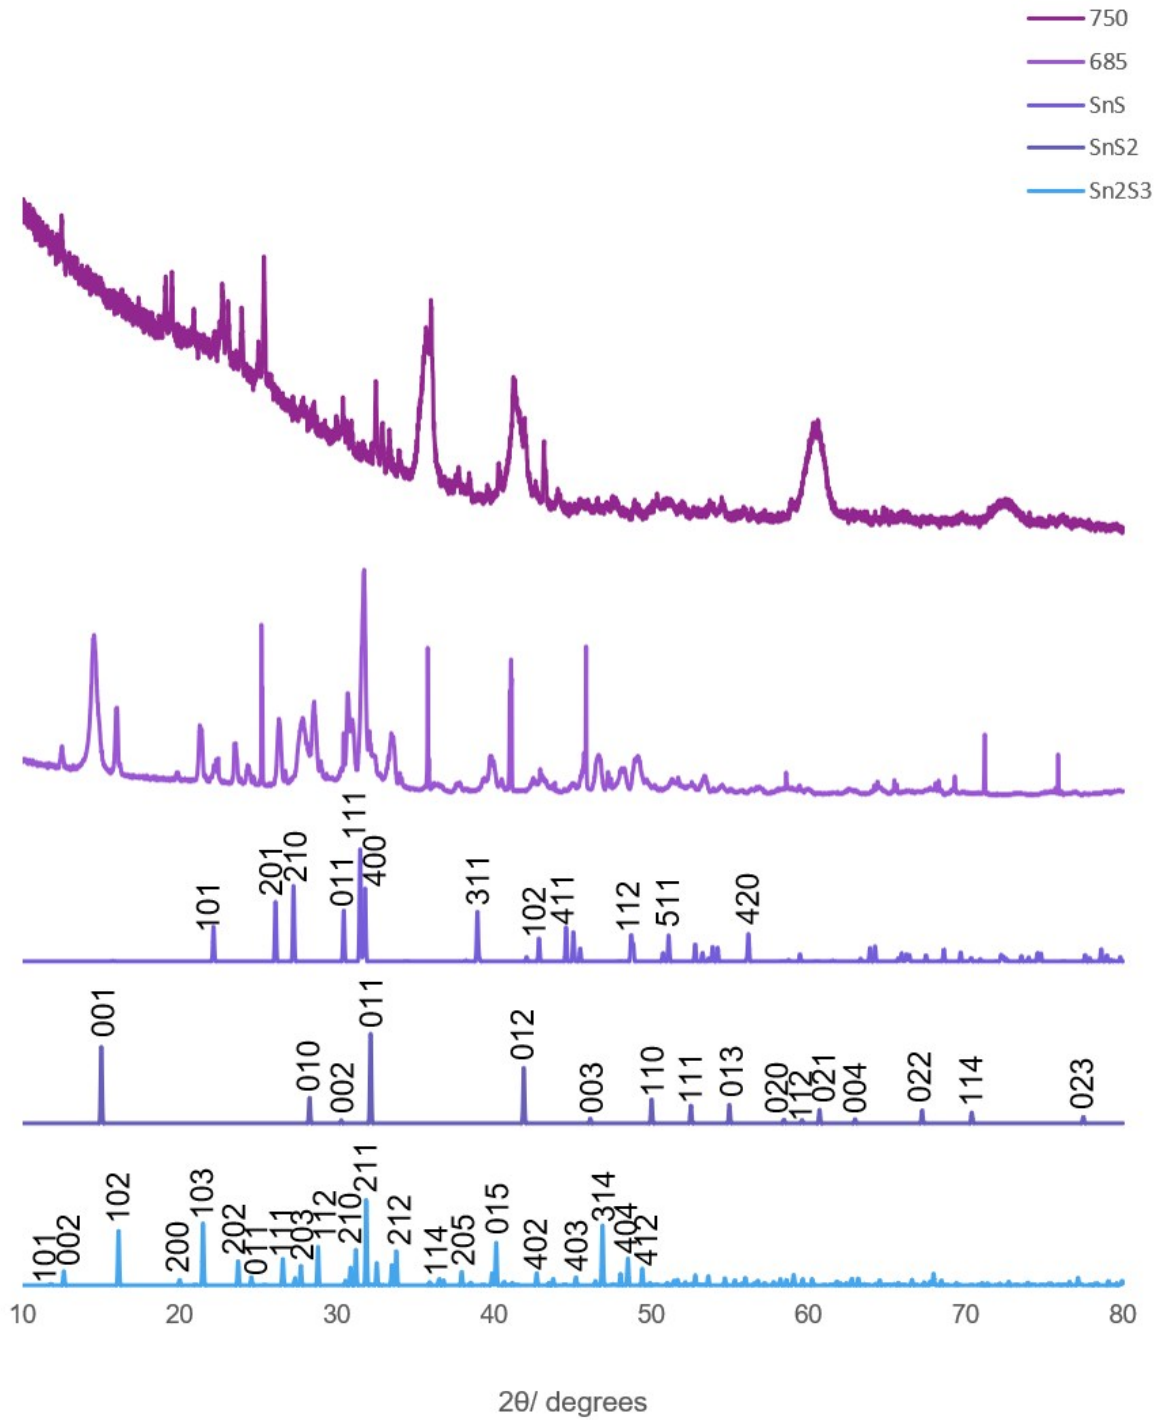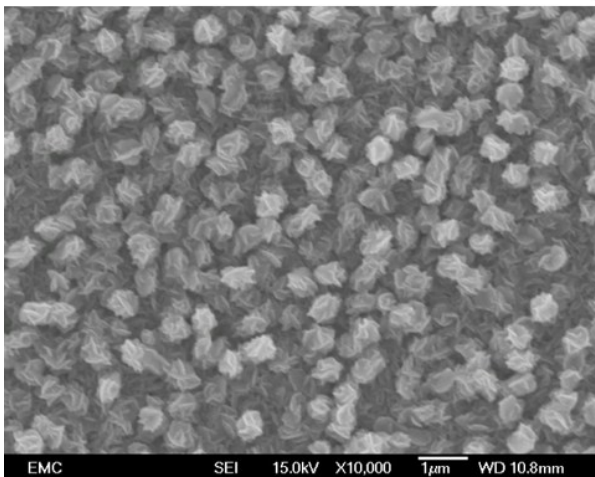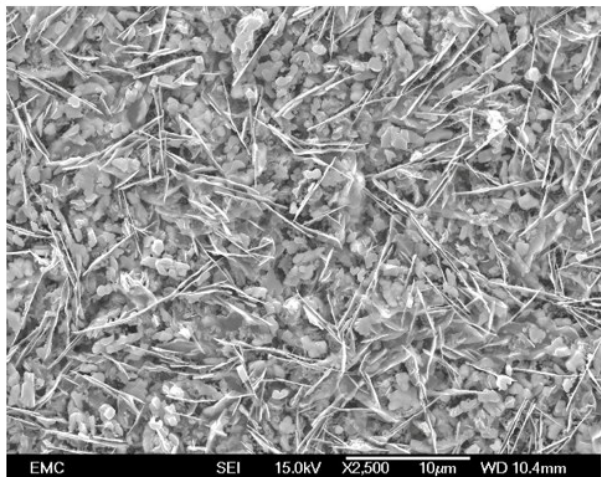

**Figure S2:** (a) XRD patterns of films deposited from (3) at 470 °C and 395 °C with stick diagrams of diffraction patterns from bulk phases; (b) SEM image of Sn<sub>2</sub>S<sub>3</sub> film and (c) SEM image of a film consisting of a mixture of Sn<sub>2</sub>S<sub>3</sub> and SnS<sub>2</sub>, deposited from (3) at 470 °C and 395 °C, respectively.

| Element | Weight% | Atomic% |
|---------|---------|---------|
| S K     | 34.00   | 65.60   |
| Sn L    | 66.00   | 34.40   |
| Totals  | 100.00  |         |

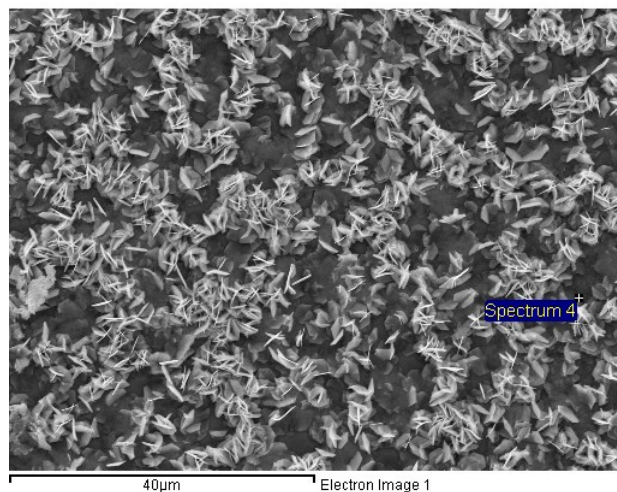

**Figure S3** EDX analysis of SnS<sub>2</sub> film deposited from (2) at 286 °C

| Element | Weight% | Atomic% |
|---------|---------|---------|
| S K     | 20.83   | 49.35   |
| Sn L    | 79.17   | 50.65   |
| Totals  | 100.00  |         |

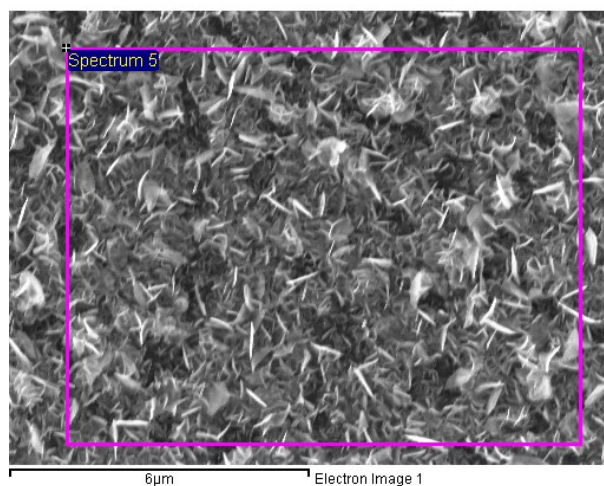

**Figure S4:** EDX analysis of SnS film deposited from (2) at 558 °C

| Element | Weight% | Atomic% |
|---------|---------|---------|
| Se L    | 56.80   | 66.40   |
| Sn L    | 43.20   | 33.60   |
| Totals  | 100.00  |         |

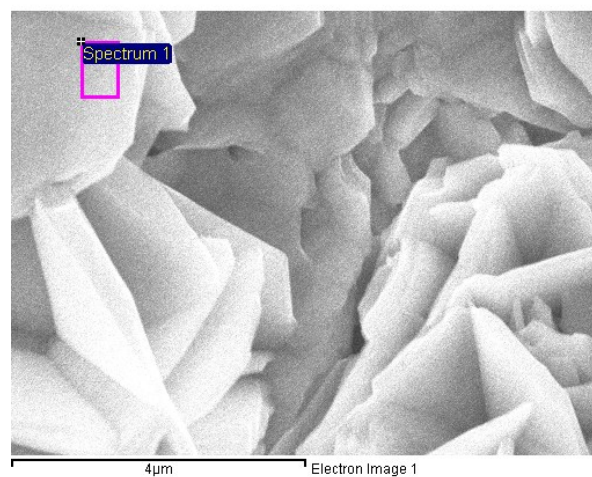

**Figure S5:** EDX analysis of SnSe<sub>2</sub> film deposited from (4) at 325 °C

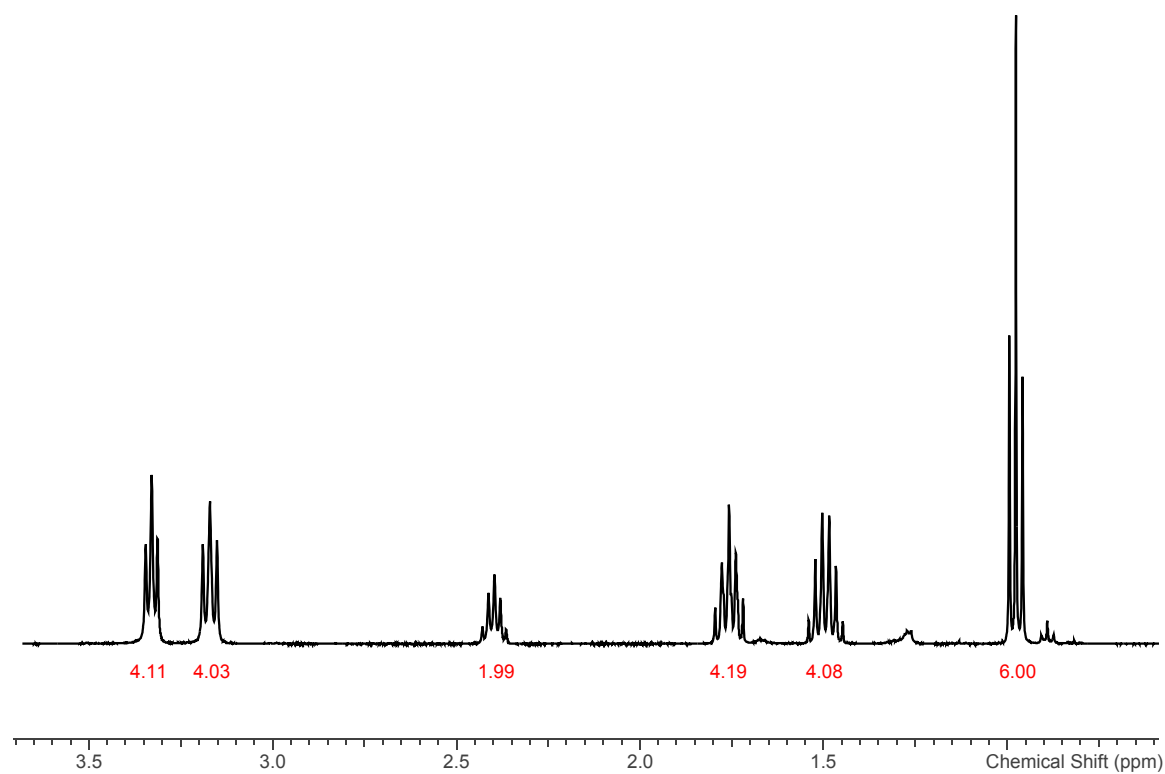

**Figure S6:** Room temperature <sup>1</sup>H NMR spectrum of [SnCl<sub>4</sub>{<sup>n</sup>BuS(CH<sub>2</sub>)<sub>3</sub>S<sup>n</sup>Bu}] (CDCl<sub>3</sub>, 25 °C).

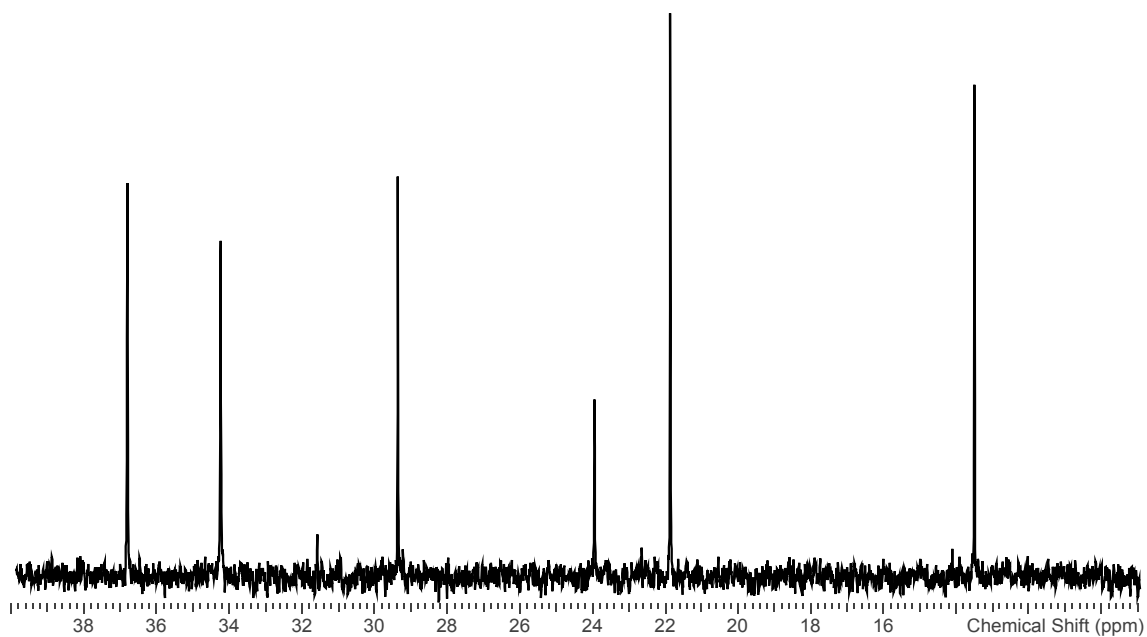

**Figure S7:** Room temperature  $^{13}\text{C}\{^1\text{H}\}$  NMR spectrum of  $[\text{SnCl}_4\{\text{nBuS}(\text{CH}_2)_3\text{Sn}^{\text{n}}\text{Bu}\}]$  ( $\text{CDCl}_3$ , 25 °C).

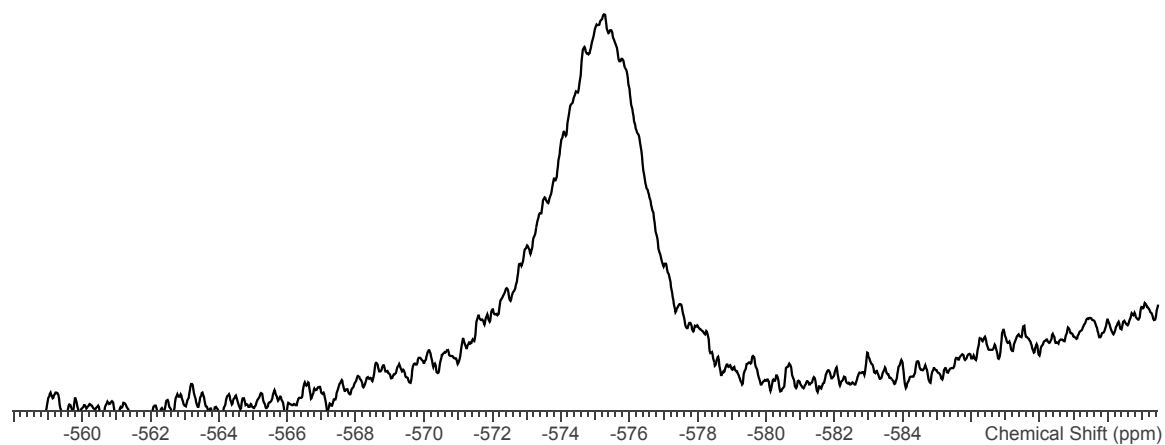

**Figure S8:** Room temperature  $^{119}\text{Sn}$  NMR spectrum of  $[\text{SnCl}_4\{\text{nBuS}(\text{CH}_2)_3\text{Sn}^{\text{n}}\text{Bu}\}]$  ( $\text{CH}_2\text{Cl}_2$ , 25 °C).

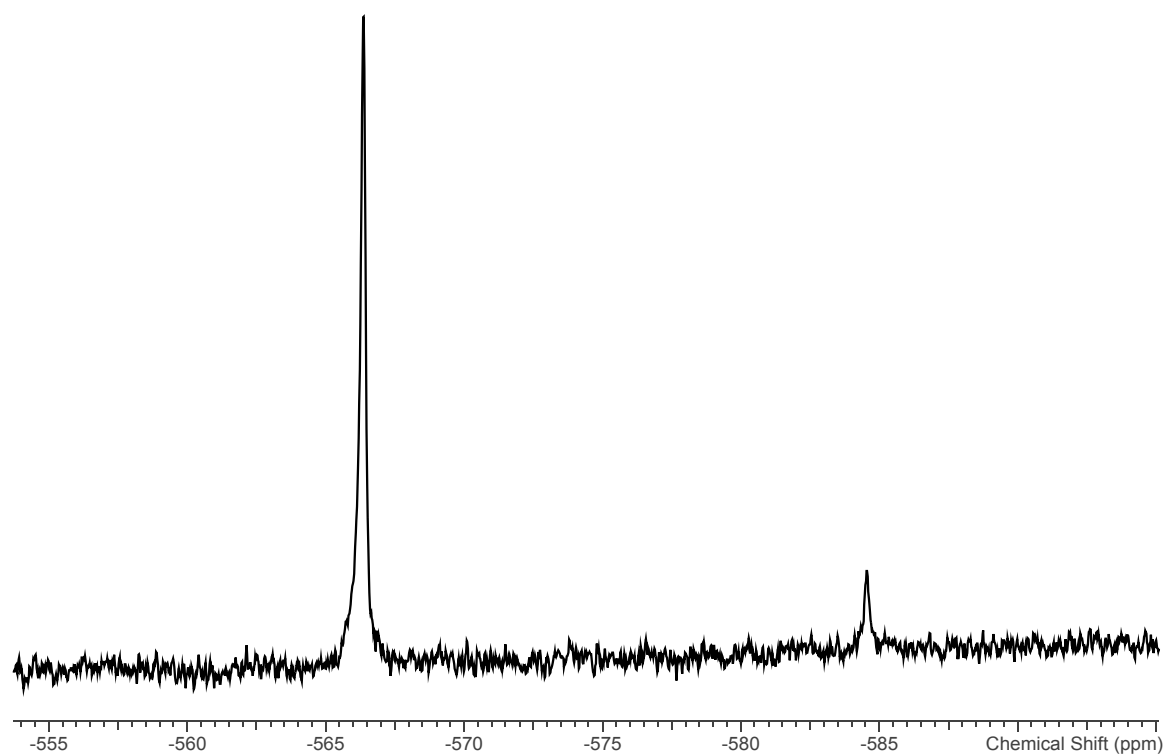

**Figure S9:** Low temperature  $^{119}\text{Sn}$  NMR spectrum of  $[\text{SnCl}_4\{\text{nBuS}(\text{CH}_2)_3\text{Sn}^{\text{nBu}}\}]$  ( $\text{CH}_2\text{Cl}_2$ ,  $-90\text{ }^\circ\text{C}$ ).

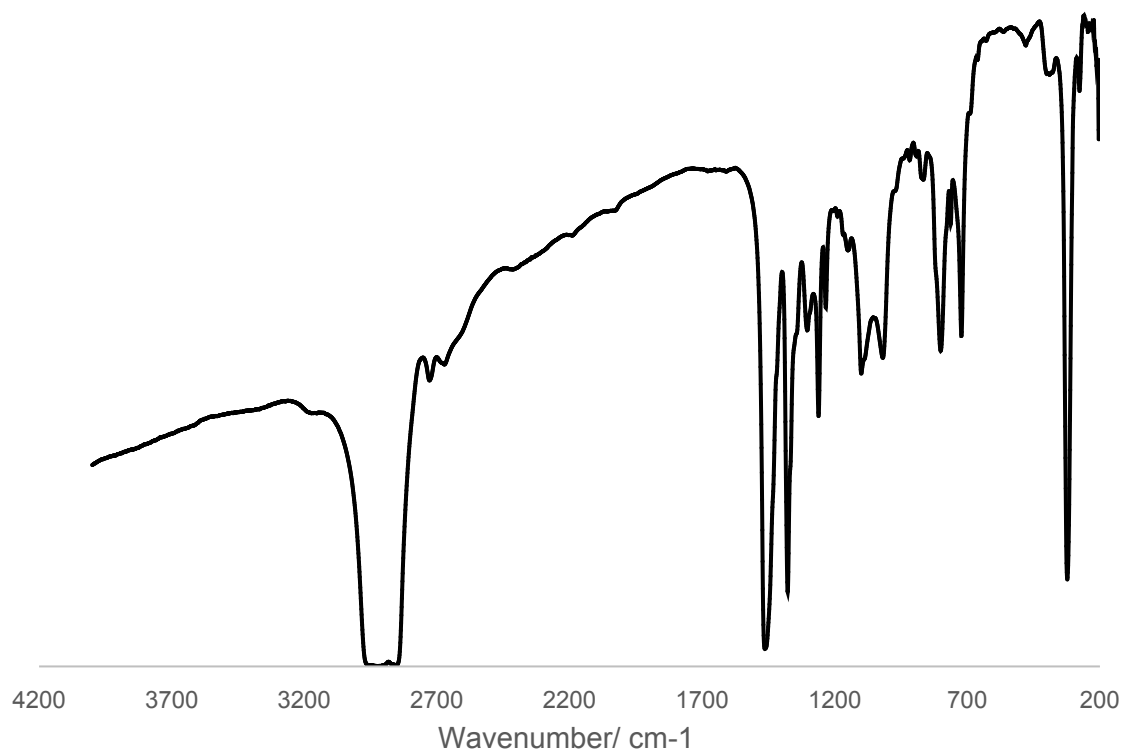

**Figure S10:** IR spectrum of  $[\text{SnCl}_4\{\text{nBuS}(\text{CH}_2)_3\text{Sn}^{\text{nBu}}\}]$  as a Nujol mull between CsI plates

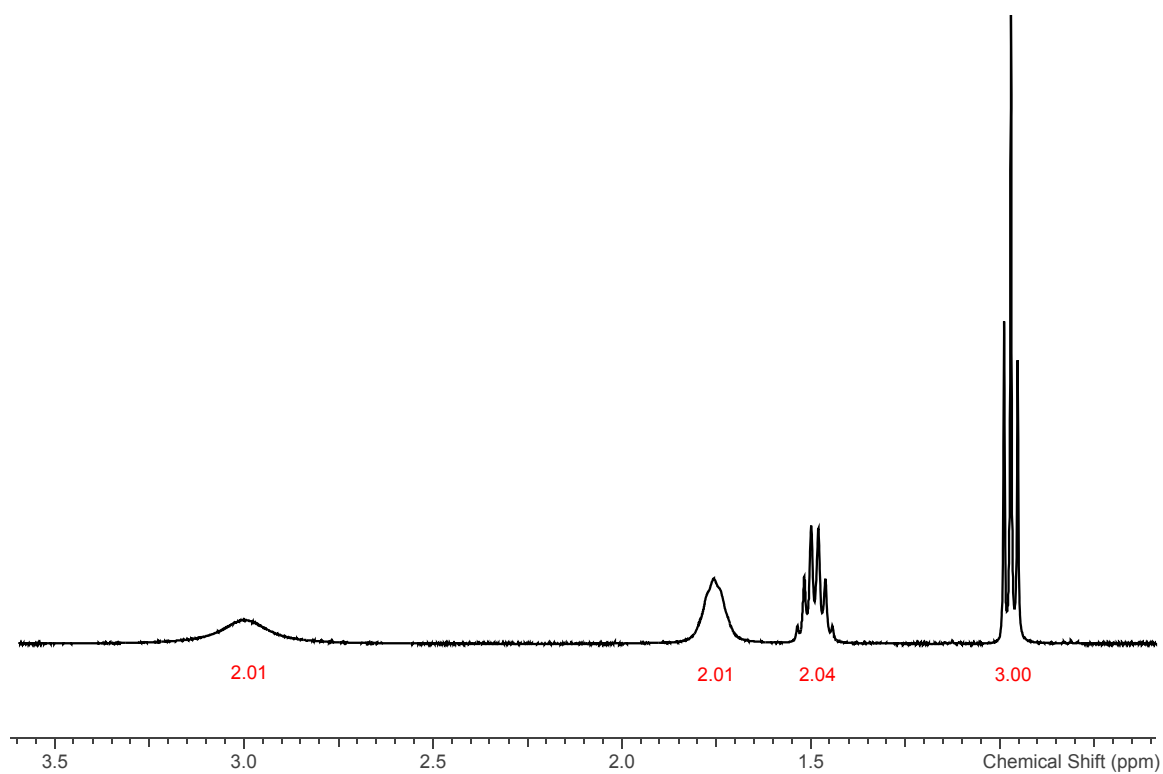

**Figure S11:** Room temperature  $^1\text{H}$  NMR spectrum of  $[\text{SnCl}_4(\text{S}^n\text{Bu}_2)_2]$  ( $\text{CDCl}_3$ ,  $25\text{ }^\circ\text{C}$ ).

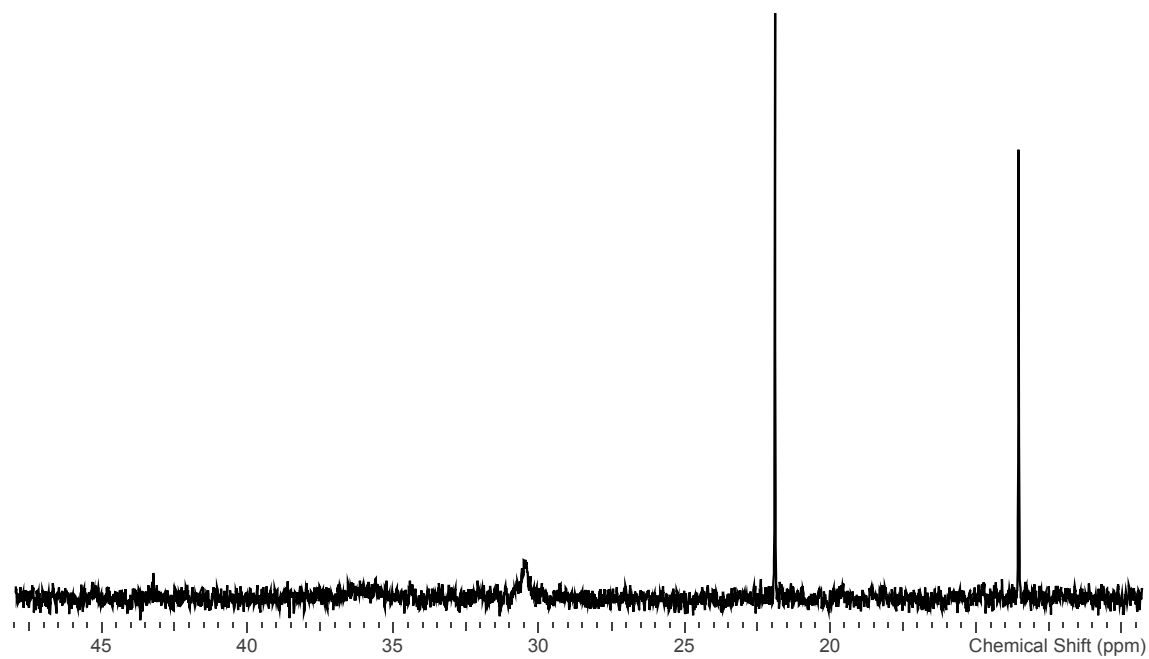

**Figure S12:** Showing the room temperature  $^{13}\text{C}\{^1\text{H}\}$  NMR spectrum of  $[\text{SnCl}_4(\text{S}^n\text{Bu}_2)_2]$  ( $\text{CDCl}_3$ ,  $25\text{ }^\circ\text{C}$ ).

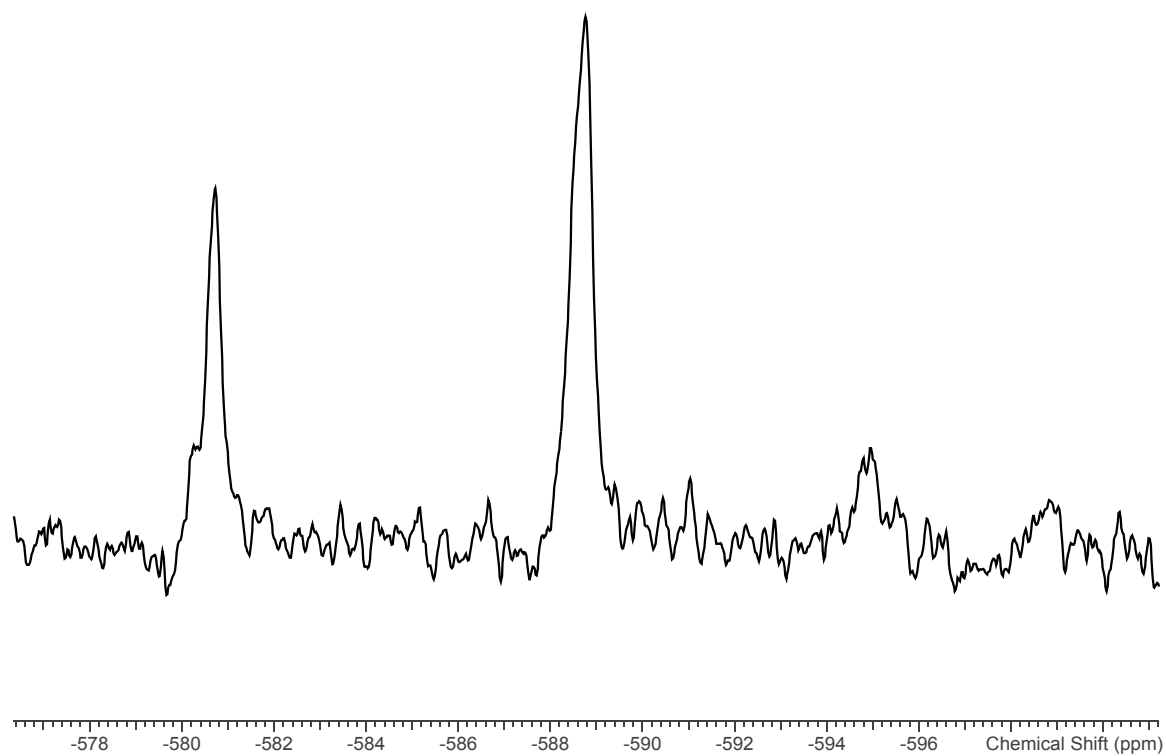

**Figure S13:** Showing the low temperature  $^{119}\text{Sn}$  NMR spectrum of  $[\text{SnCl}_4(\text{S}^n\text{Bu}_2)_2]$  ( $\text{CH}_2\text{Cl}_2$ ,  $-50\text{ }^\circ\text{C}$ ).



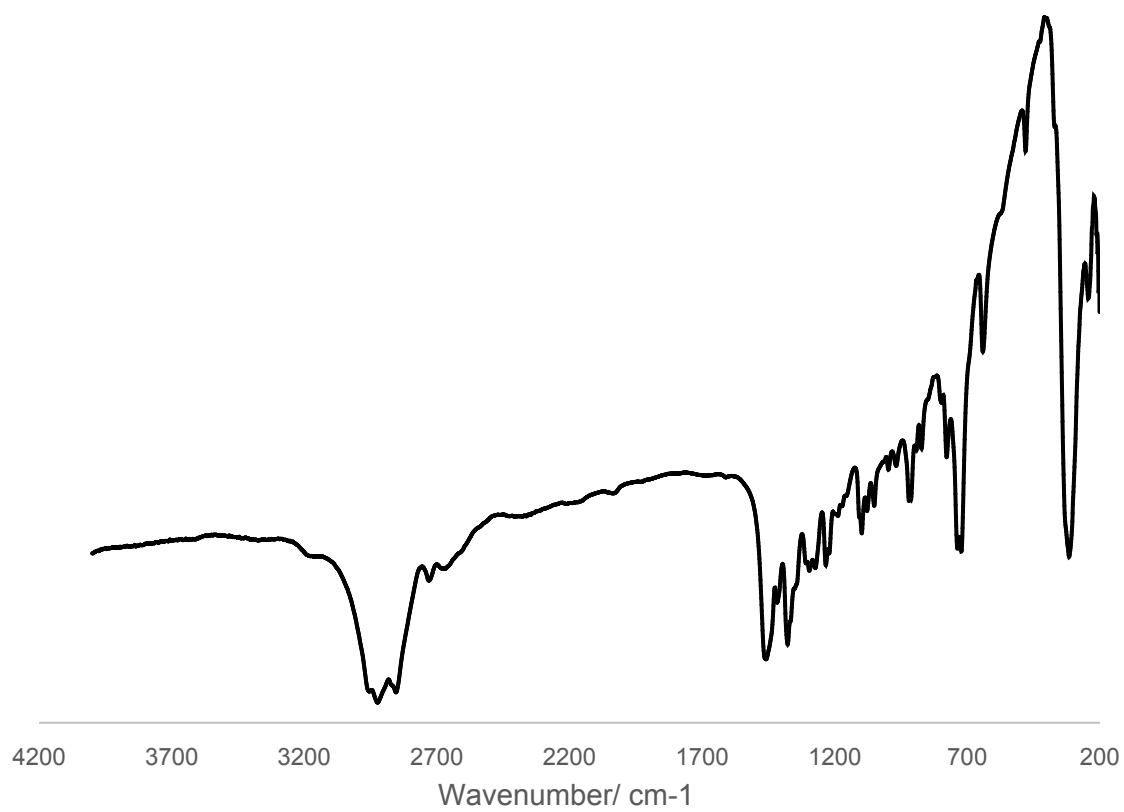

**Figure S14:** Showing the IR spectrum of  $[\text{SnCl}_4(\text{S}^n\text{Bu}_2)_2]$  as a Nujol mull between CsI plates.

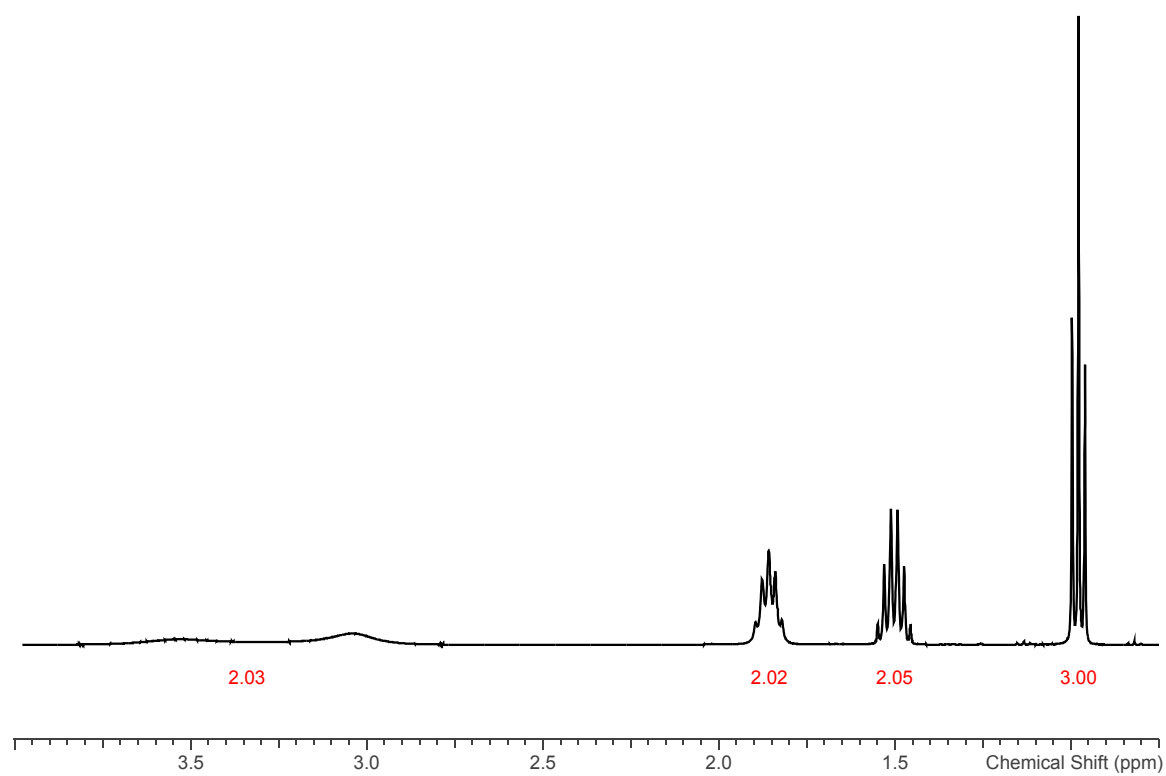

**Figure S15:** Room temperature  $^1\text{H}$  NMR spectrum of  $[\text{SnCl}_4(\text{Se}^n\text{Bu}_2)_2]$  ( $\text{CDCl}_3$ , 25  $^\circ\text{C}$ ).

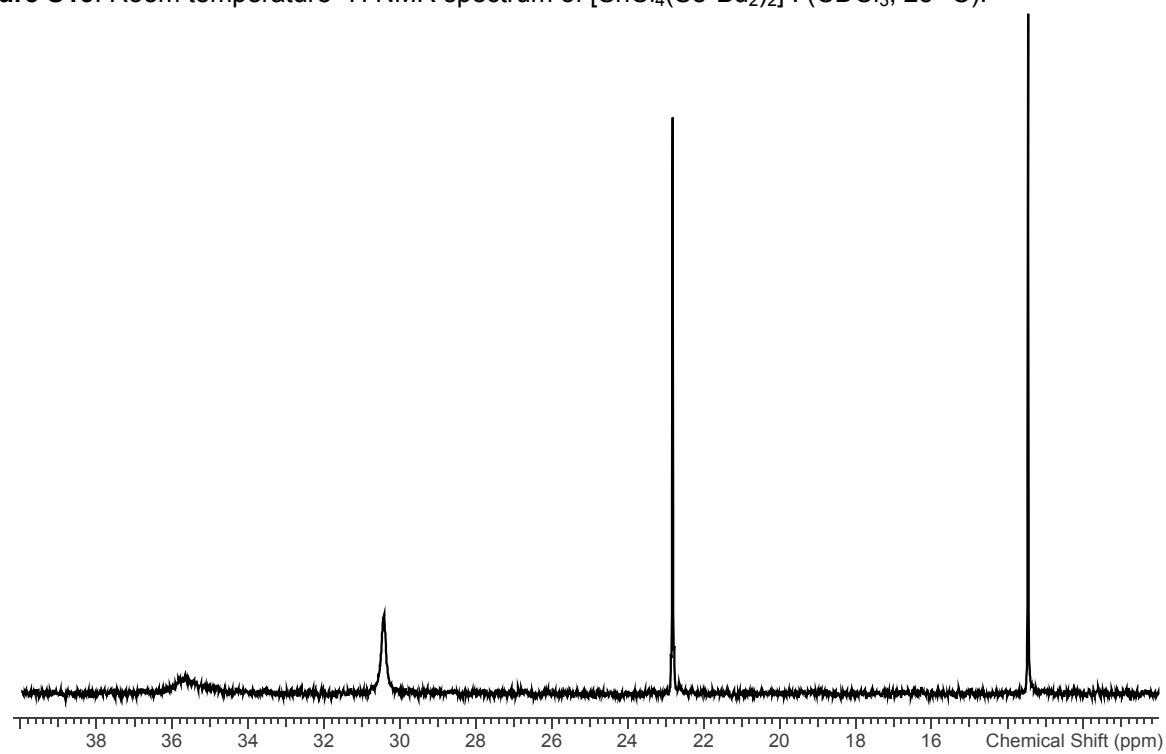

**Figure S16:** Room temperature  $^{13}\text{C}\{^1\text{H}\}$  NMR spectrum of  $[\text{SnCl}_4(\text{Se}^n\text{Bu}_2)_2]$  ( $\text{CDCl}_3$ , 25  $^\circ\text{C}$ ).

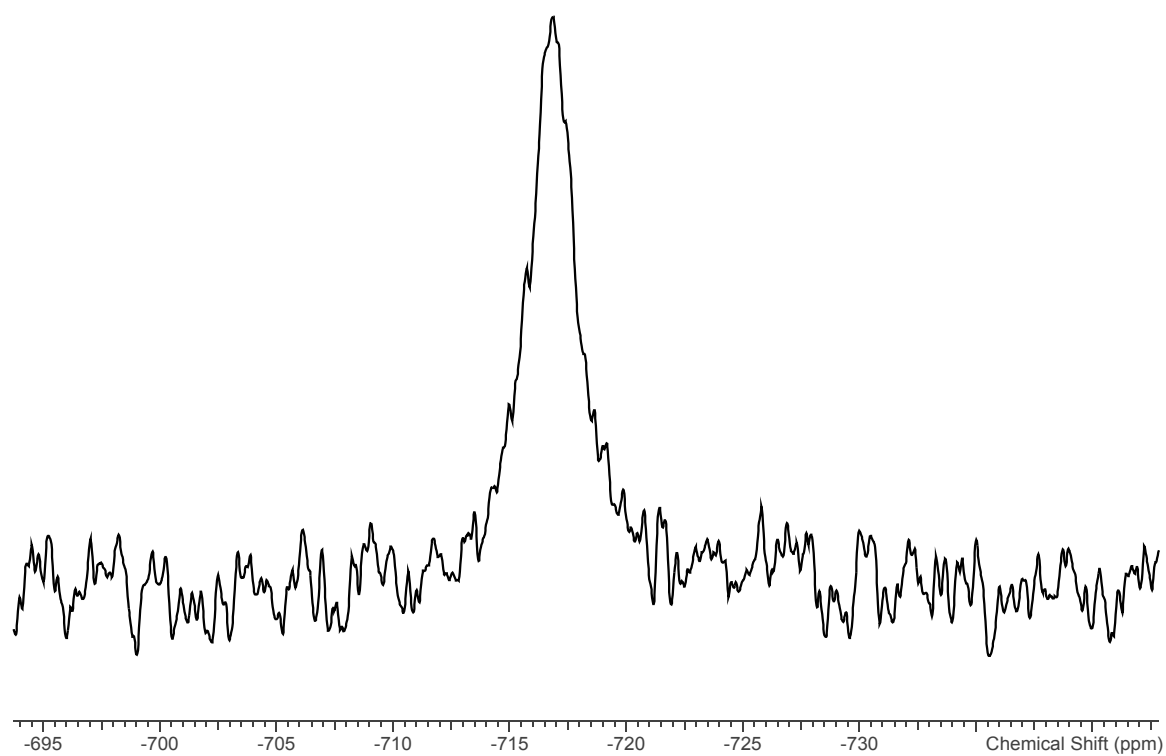

**Figure S17:** Room temperature  $^{119}\text{Sn}$  NMR spectrum of  $[\text{SnCl}_4(\text{Se}^n\text{Bu}_2)_2]$  ( $\text{CH}_2\text{Cl}_2$ , 25 °C).

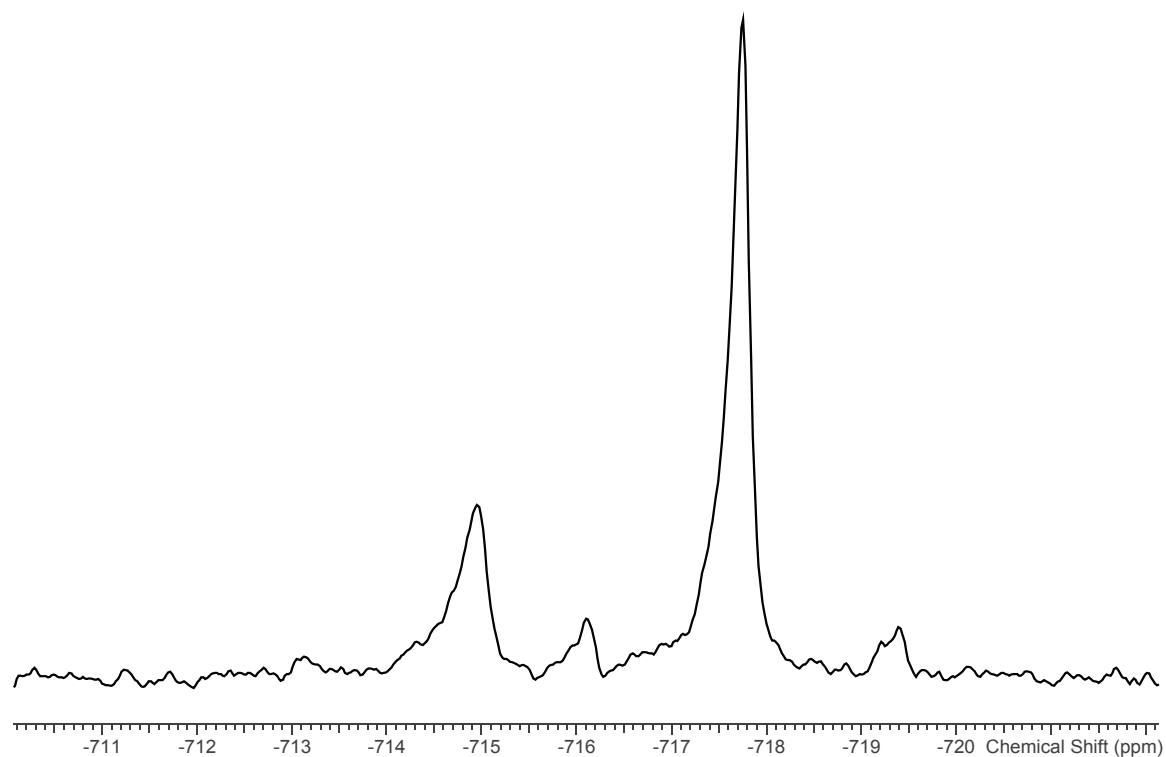

**Figure S18:** Low temperature  $^{119}\text{Sn}$  NMR spectrum of  $[\text{SnCl}_4(\text{Se}^n\text{Bu}_2)_2]$  ( $\text{CH}_2\text{Cl}_2$ , -90 °C).

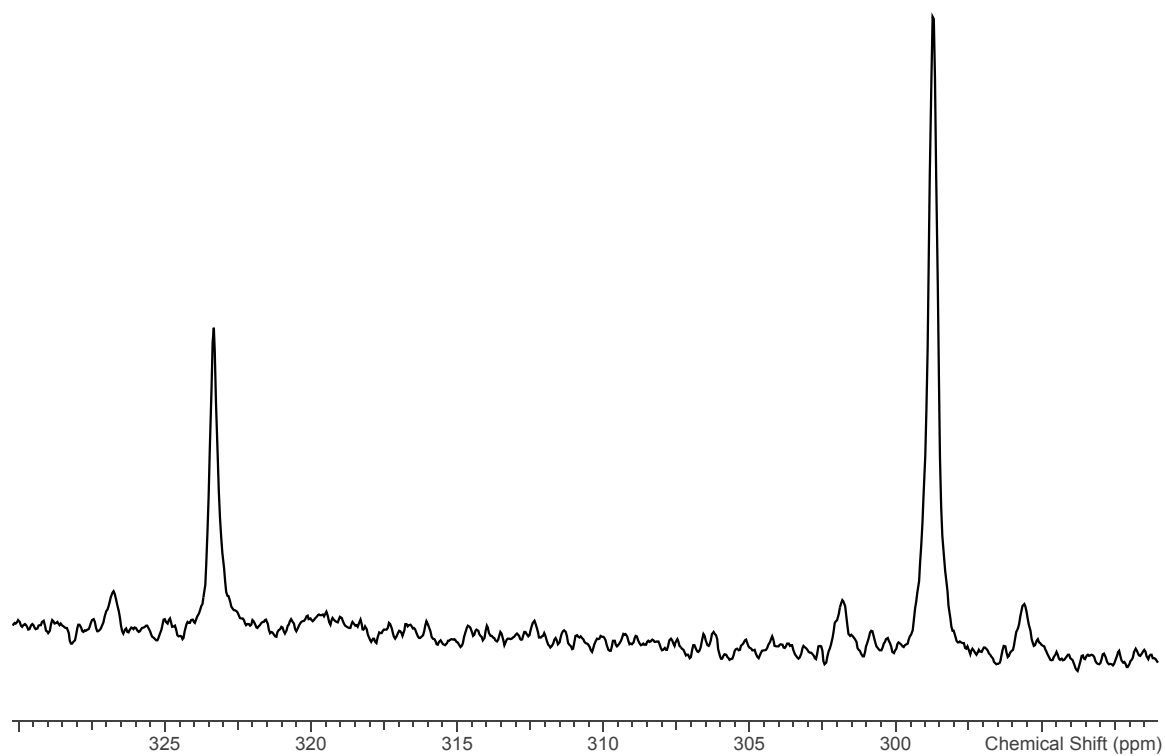

**Figure S19:** Low temperature  $^{77}\text{Se}\{^1\text{H}\}$  NMR spectrum of  $[\text{SnCl}_4(\text{Se}^n\text{Bu}_2)_2]$  ( $\text{CH}_2\text{Cl}_2$ ,  $-90^\circ\text{C}$ ).

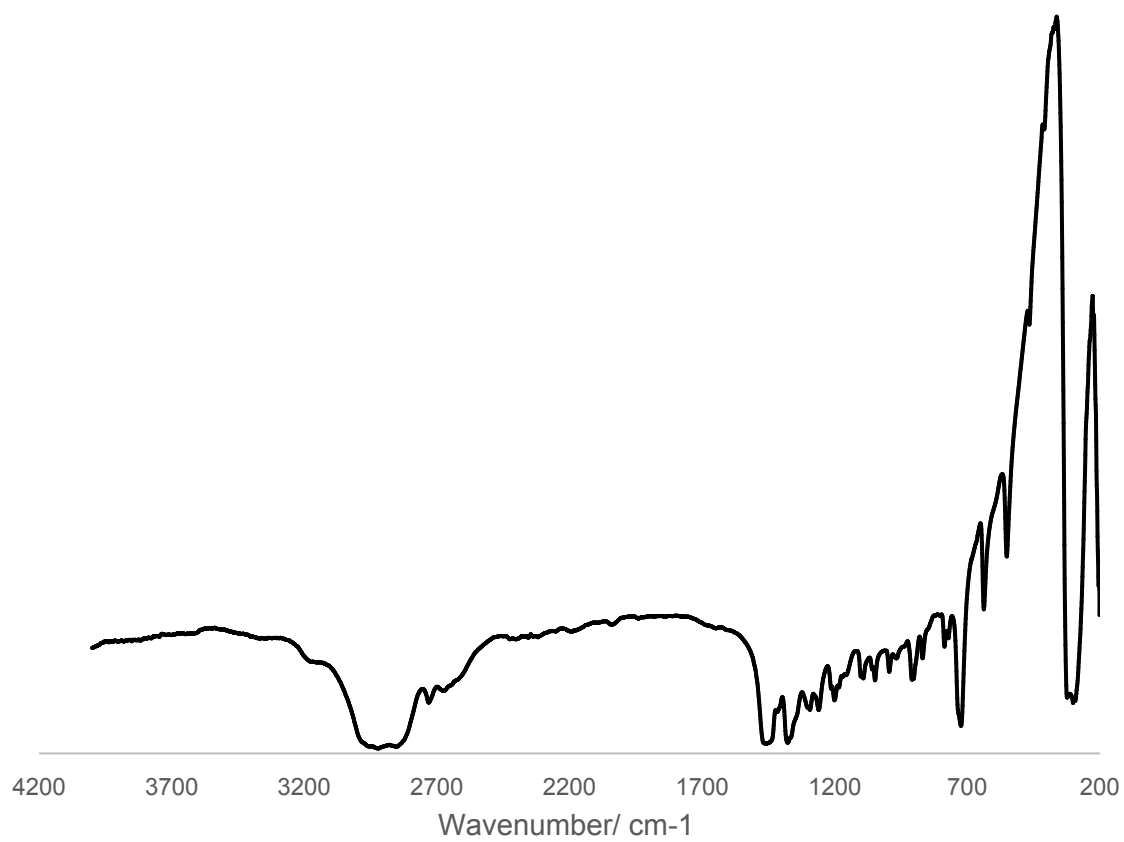

**Figure S20:** IR spectrum of  $[\text{SnCl}_4(\text{Se}^n\text{Bu}_2)_2]$  as a Nujol mull between CsI plates.
